# Supplementary material for: A Low-Cost Microfluidic-Based Detection Device for Rapid Identification and Quantification of Biomarkers-Based on a Smartphone
Source: MDPI journal article supplement (doi:10.3390/bios13070753), 2023-07-22
Supplement: s1 [file s1]

Supplementary Materials

# A Low-Cost Microfluidic-Based Detection Device for Rapid Identification and Quantification of Biomarkers-Based on a Smartphone

Chonghui Yang <sup>†</sup>, Yujing Yang <sup>†</sup>, Gaozhen Zhao, Huan Wang, Yang Dai and Xiaowen Huang <sup>\*</sup>

State Key Laboratory of Biobased Material and Green Papermaking, School of Bioengineering, Qilu University of Technology, Shandong Academy of Sciences, Jinan 250353, China; yangchonghui2022@126.com (C.Y.); 10431211246@stu.qlu.edu.cn (Y.Y.); 10431210986@stu.qlu.edu.cn (G.Z.); 10431221233@stu.qlu.edu.cn (H.W.); 10431221222@stu.qlu.edu.cn (Y.D.)

<sup>\*</sup> Correspondence: huangxiaowen2013@gmail.com

<sup>†</sup> These authors contributed equally to this work.

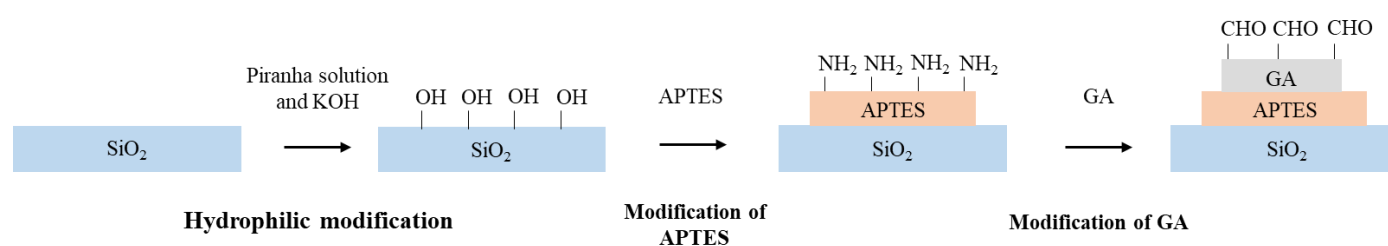

**Figure S1** Schematic illustrating the modification procedure of glass capillary.

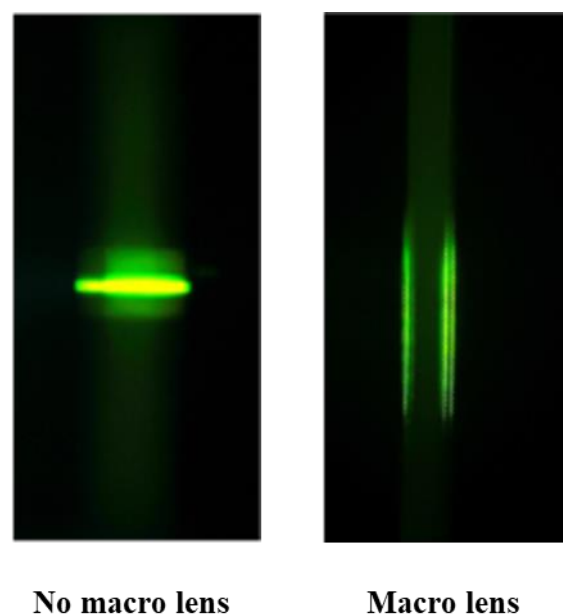

**Figure S2.** Fluorescence images of BSA-FITC with no macro lens and a macro lens.

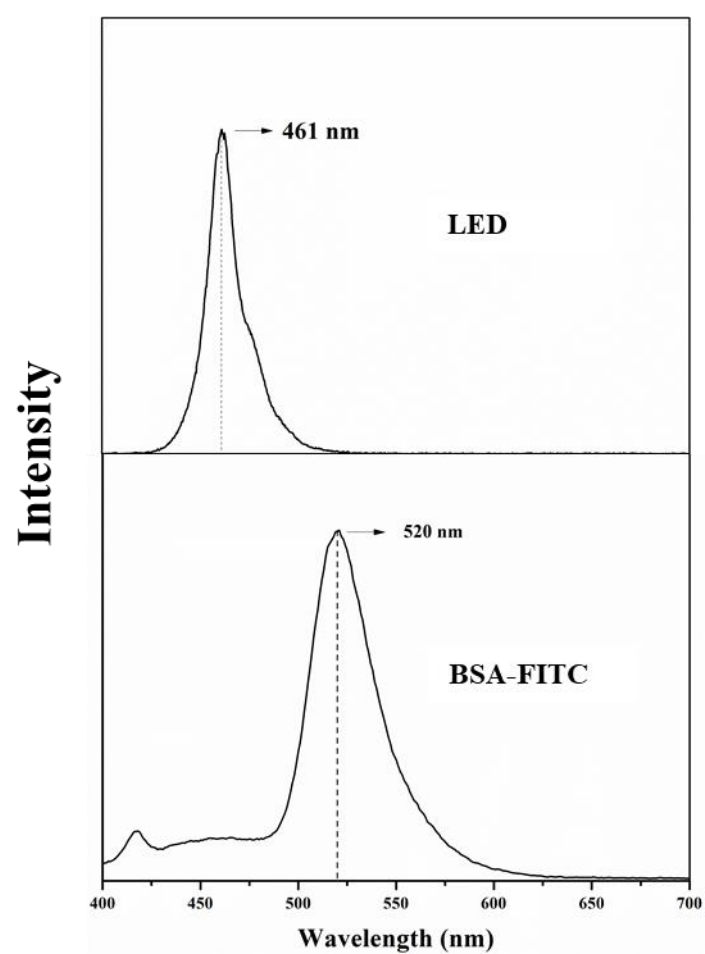

**Figure S3.** The excitation wavelength of LED, and the emission wavelength of BSA-FITC.

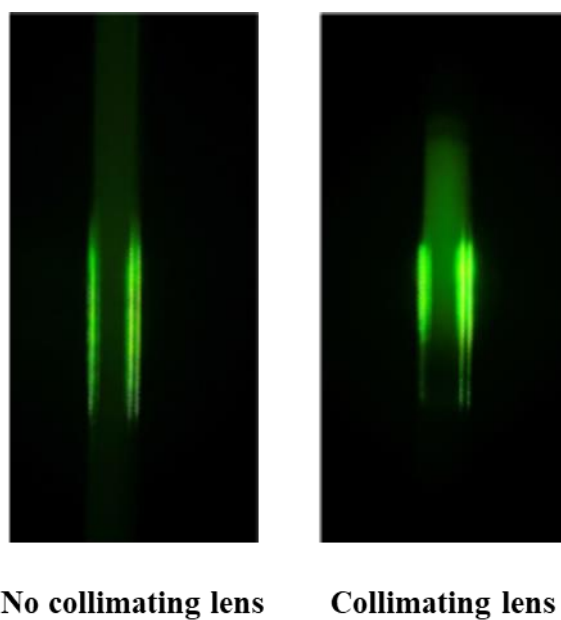

**Figure S4.** Fluorescence images of BSA-FITC with no collimating lens and a collimating lens.

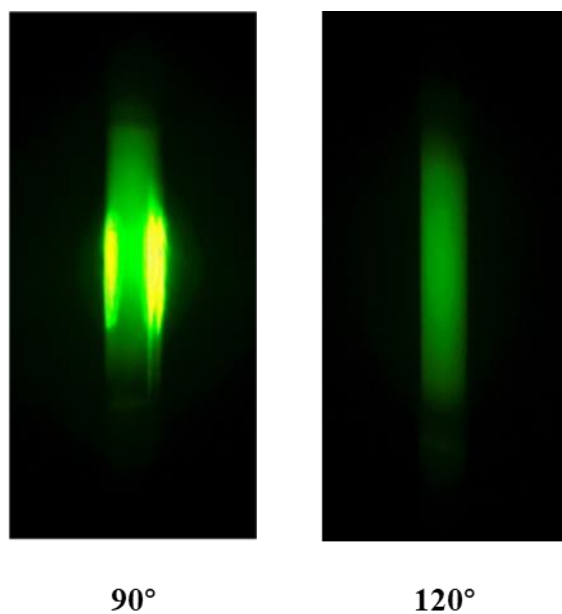

**Figure S5.** Fluorescence images of BSA-FITC with 90° and 120°.

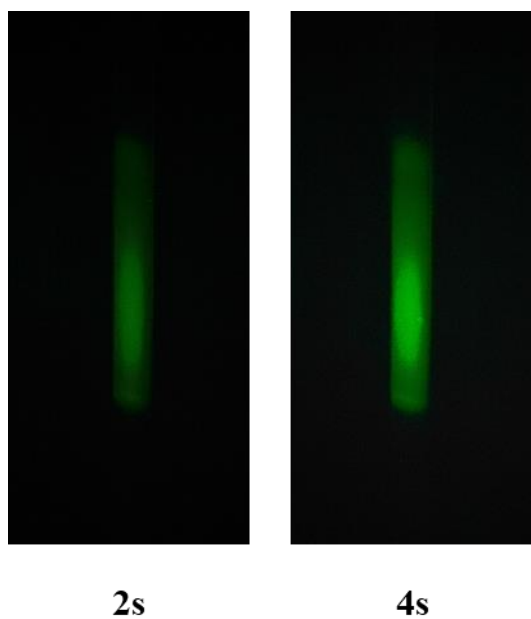

**Figure S6.** Fluorescent images of BSA-FITC with shutter speeds of 2s and 4s. Fluorescence intensity of BSA-FITC increases with increasing shutter speed.

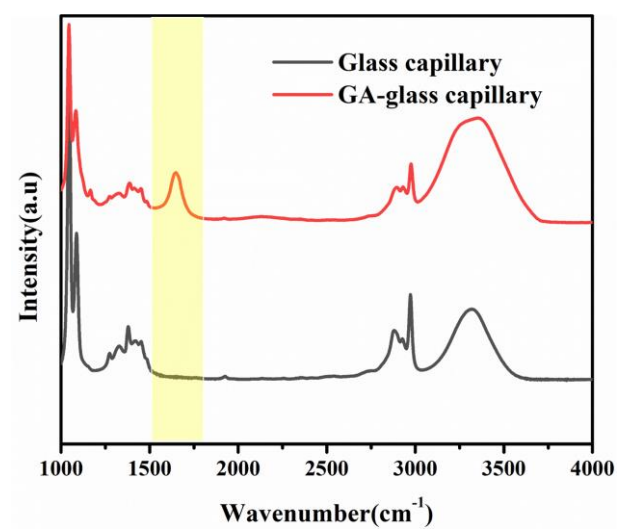

**Figure S7.** Fourier transform infrared spectroscopy of glass capillary and GA-glass capillary.

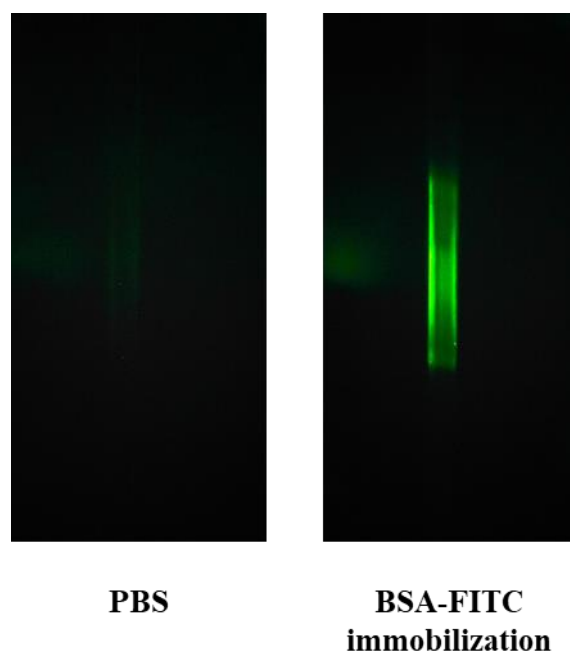

**Figure S8.** Fluorescence images of BSA-FITC with PBS solution and a BSA-FITC immobilization.
